# Supplementary material for: Facile and cost-effective synthesis of CNT@MCo2O4 (M = Ni, Mn, Cu, Zn) core–shell hybrid nanostructures for organic dye removal
Source: Royal Society of Chemistry journal article supplement (doi:10.1039/c5ra14748d), 2015-01-01
Supplement: c5ra14748d1.pdf [file c5ra14748d1.pdf]

## Supplementary Material

### Adsorption kinetics, isotherms and thermodynamic

#### 1. Adsorption Kinetics

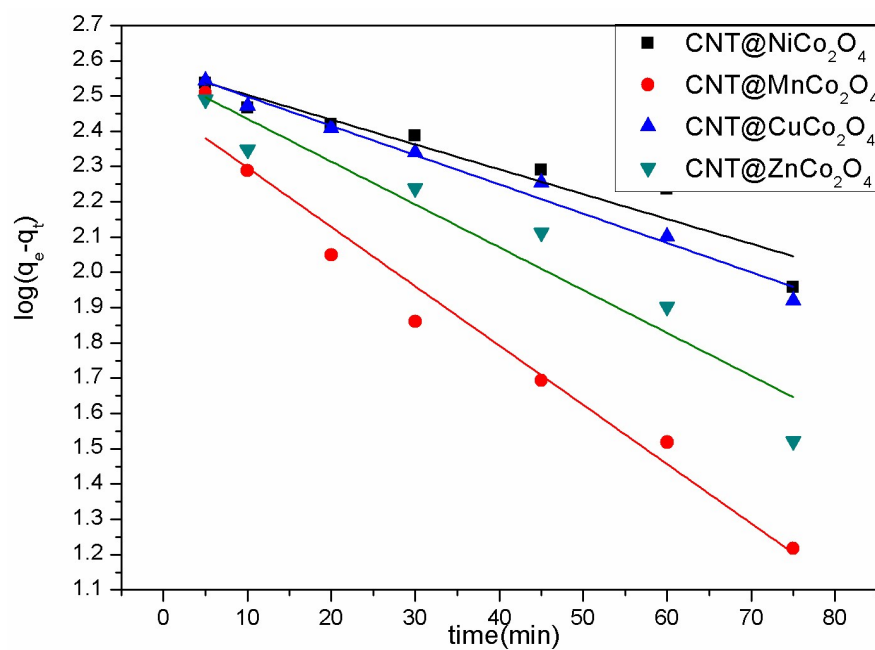

**Fig.S1.** Plot of the pseudo-first-order kinetic model for MO on CNT@MCo<sub>2</sub>O<sub>4</sub> at the initial solution concentration of 600mg/L.

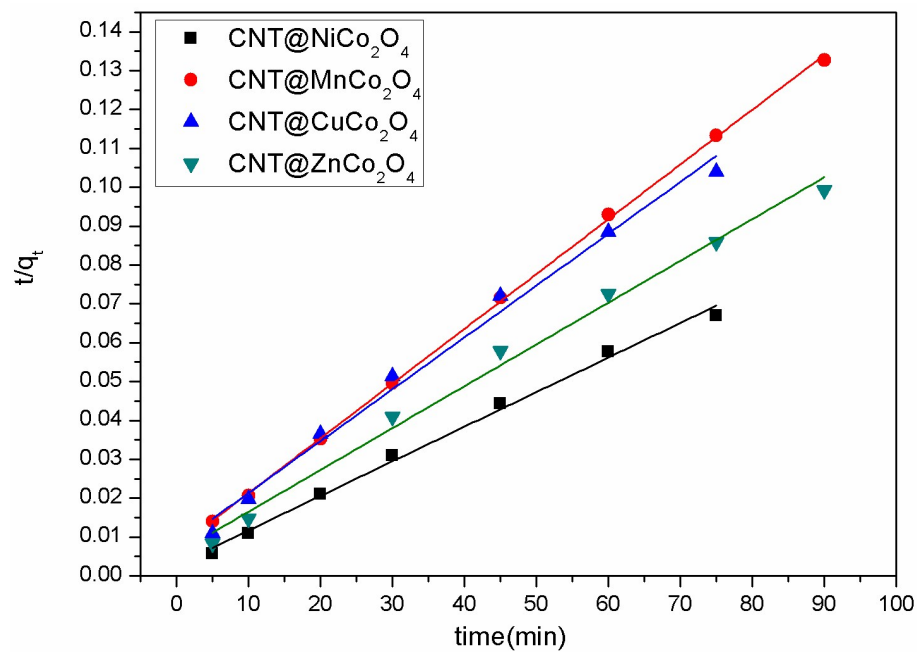

**Fig.S2.** Plot of the pseudo-second-order kinetic model for MO on CNT@MCo<sub>2</sub>O<sub>4</sub> at the initial solution concentration of 600mg/L.

## 2. Adsorption Isotherms

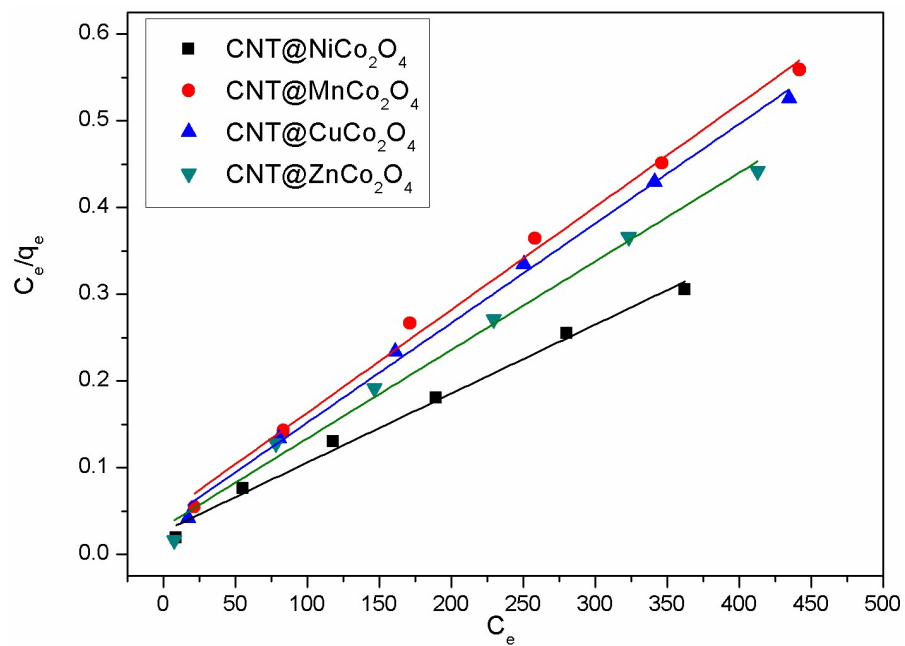

**Fig.S3** Langmuir adsorption isotherm plots for MO adsorption onto CNT@MCo<sub>2</sub>O<sub>4</sub>

at 293K

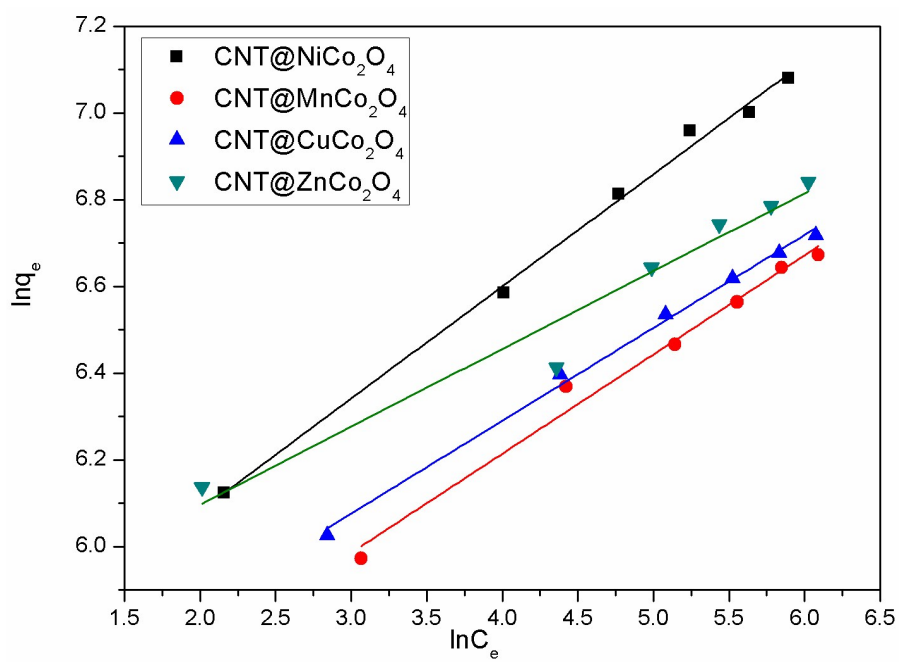

**Fig.S4** Freundlich adsorption isotherm plots for MO adsorption onto CNT@MCo<sub>2</sub>O<sub>4</sub>

at 293K

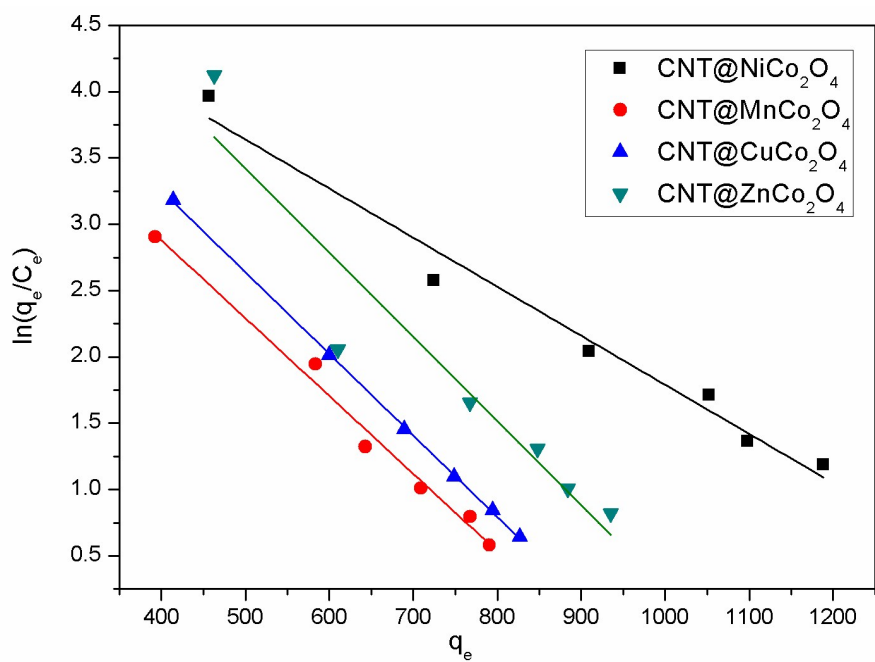

**Fig.S5.** Plots of  $\ln q_e/C_e$  versus  $q_e$  of CNT@MCo<sub>2</sub>O<sub>4</sub> at 293K
